# Supplementary material for: Food biodiversity and total and cause-specific mortality in 9 European countries: An analysis of a prospective cohort study
Source: PubMed Central journal article supplement (PMC8559947; doi:10.1371/journal.pmed.1003834), 2021-10-18

**S1 Fig. Participants' flowchart, EPIC cohort, 1992–2014.** EPIC, European Prospective Investigation into Cancer and Nutrition.

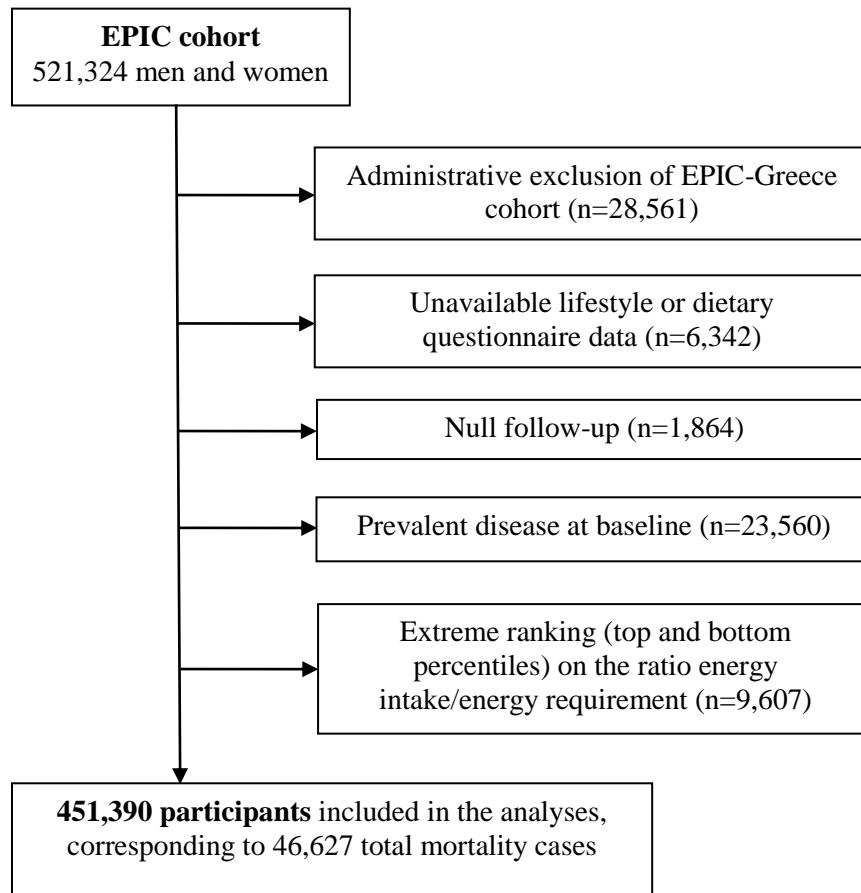

Supplement: pmed.1003834.s001.pdf [file pmed.1003834.s001.pdf]
