# Supplementary material for: Food biodiversity and total and cause-specific mortality in 9 European countries: An analysis of a prospective cohort study
Source: PubMed Central journal article supplement (PMC8559947; doi:10.1371/journal.pmed.1003834), 2021-10-18

**S2 Fig. Kaplan-Meier curve of overall survival probability by quintile of dietary species richness, EPIC cohort, 1992-2014.** EPIC, European Prospective Investigation into Cancer and Nutrition

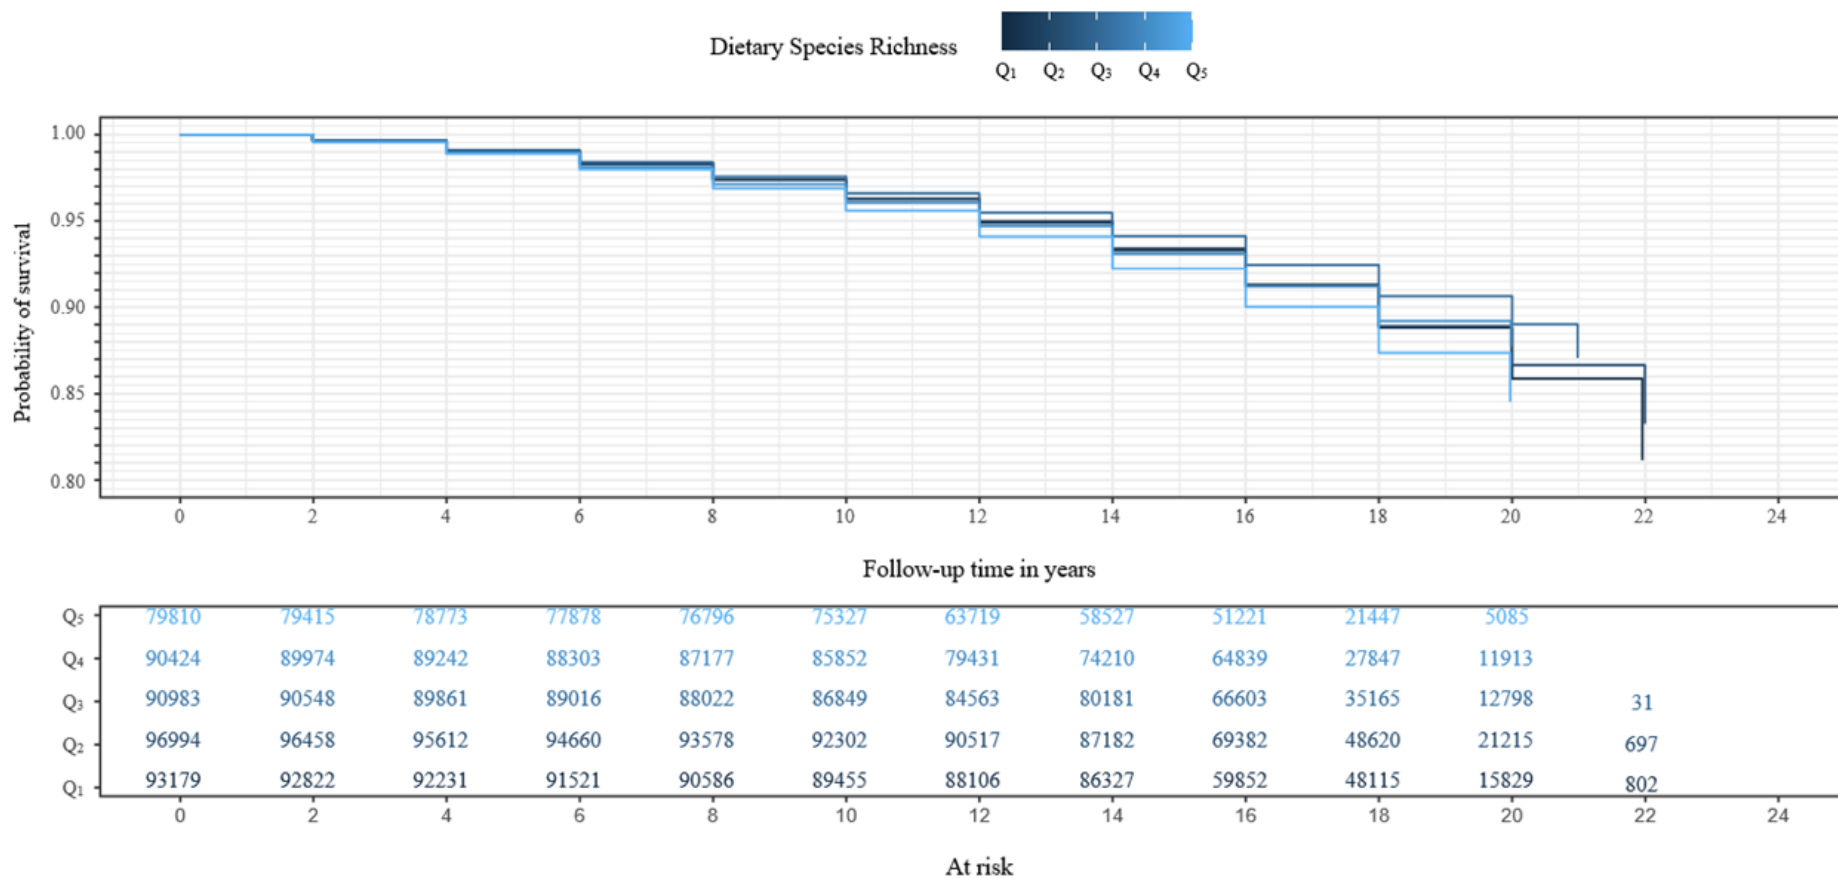

Supplement: pmed.1003834.s002.pdf [file pmed.1003834.s002.pdf]
