# Supplementary material for: Food biodiversity and total and cause-specific mortality in 9 European countries: An analysis of a prospective cohort study
Source: PubMed Central journal article supplement (PMC8559947; doi:10.1371/journal.pmed.1003834), 2021-10-18
Supplement: pmed.1003834.s004.pdf [file pmed.1003834.s004.pdf]

**S1 Table. Food biodiversity codes assigned to the EPIC cohort's food list.** EPIC, European Prospective Investigation into Cancer and Nutrition.

| FoodEx2 term code | Generic name               | Species                       |
|-------------------|----------------------------|-------------------------------|
| A000G             | Oat                        | <i>Avena sativa</i>           |
| A000N             | Buckwheat                  | <i>Fagopyrum esculentum</i>   |
| A000P             | Barley                     | <i>Hordeum vulgare</i>        |
| A000T             | Maize                      | <i>Zea mays</i>               |
| A000Y             | Finger millet              | <i>Eleusine coracana</i>      |
| A001B             | Pearl millet               | <i>Cenchrus americanus</i>    |
| A001D             | Asian rice                 | <i>Oryza sativa</i>           |
| A001K             | Rye                        | <i>Secale cereale</i>         |
| A001N             | Common wheat, spelt        | <i>Triticum aestivum</i>      |
| A001P             | Durum wheat                | <i>Triticum durum</i>         |
| A00FX             | Head cabbages              | <i>Brassica oleracea</i>      |
| A00GG             | Chinese cabbages, turnip   | <i>Brassica rapa</i>          |
| A00GZ             | Garlic                     | <i>Allium sativum</i>         |
| A00HC             | Onions                     | <i>Allium cepa</i>            |
| A00JA             | Sweet pepper               | <i>Capsicum annuum</i>        |
| A00JB             | Chili peppers              | <i>Capsicum frutescens</i>    |
| A00JD             | Aubergine                  | <i>Solanum melongena</i>      |
| A00JF             | Okra                       | <i>Abelmoschus esculentus</i> |
| A00JM             | Cucumber, gherkin          | <i>Cucumis sativus</i>        |
| A00KA             | Burr gherkin               | <i>Cucumis anguria</i>        |
| A00JR             | Courgette, pumpkin, squash | <i>Cucurbita pepo</i>         |
| A00KF             | Melons                     | <i>Cucumis melo</i>           |
| A00KJ             | Watermelon                 | <i>Citrullus lanatus</i>      |
| A00KX             | Head lettuces              | <i>Lactuca sativa</i>         |
| A00LF             | Curly endives              | <i>Cichorium endivia</i>      |
| A00LG             | Radicchio, Belgian endives | <i>Cichorium intybus</i>      |
| A00LQ             | Red mustard leaves         | <i>Brassica juncea</i>        |
| A00MJ             | Spinach                    | <i>Spinacia oleracea</i>      |
| A00ND             | Watercress                 | <i>Nasturtium officinale</i>  |
| A00NQ             | Salsify leaves             | <i>Tragopogon porrifolius</i> |
| A00PA             | Common nettle              | <i>Urtica dioica</i>          |
| A00PH             | Broad beans                | <i>Vicia faba</i>             |
| A00PR             | Mung beans                 | <i>Vigna radiata</i>          |
| A00PV             | Black eyed peas            | <i>Vigna unguiculata</i>      |
| A00PY             | Peas                       | <i>Pisum sativum</i>          |
| A00QG             | Beets, chards              | <i>Beta vulgaris</i>          |
| A00QH             | Carrots                    | <i>Daucus carota</i>          |
| A00QJ             | Celeriac, celery           | <i>Apium graveolens</i>       |
| A00QK             | Horseradish root           | <i>Armoracia rusticana</i>    |
| A00QQ             | Jerusalem artichoke        | <i>Helianthus tuberosus</i>   |
| A00QR             | Parsnip root               | <i>Pastinaca sativa</i>       |
| A00QV             | Radish, daikon             | <i>Raphanus sativus</i>       |
| A00RC             | Black salsify              | <i>Scorzonera hispanica</i>   |
| A00RD             | Swede, rapeseed            | <i>Brassica napus</i>         |
| A00RS             | Globe artichoke, cardoon   | <i>Cynara cardunculus</i>     |
| A00RT             | Asparagus                  | <i>Asparagus officinalis</i>  |
| A00RV             | Bamboo                     | <i>Bambusa vulgaris</i>       |
| A00SB             | Leek                       | <i>Allium ampeloprasum</i>    |
| A00SD             | Rhubarb                    | <i>Rheum rhabarbarum</i>      |
| A00SH             | Alfalfa                    | <i>Medicago sativa</i>        |
| A00TQ             | Button mushrooms           | <i>Agaricus bisporus</i>      |
| A00VD             | Sea lettuce                | <i>Ulva lactuca</i>           |
| A00VH             | Laver                      | <i>Porphyra yezoensis</i>     |
| A00VL             | Hijiki                     | <i>Sargassum fusiforme</i>    |
| A00VV             | Basil                      | <i>Ocimum basilicum</i>       |
| A00XD             | Chive                      | <i>Allium schoenoprasum</i>   |
| A00XV             | Oregano                    | <i>Origanum vulgare</i>       |
| A00YE             | Parsley                    | <i>Petroselinum crispum</i>   |
| A00ZT             | Potato                     | <i>Solanum tuberosum</i>      |

|       |                           |                                              |
|-------|---------------------------|----------------------------------------------|
| A00ZZ | Cassava                   | <i>Manihot esculenta</i>                     |
| A010C | Sweet potato              | <i>Ipomoea batatas</i>                       |
| A012F | Soybean                   | <i>Glycine max</i>                           |
| A012T | Common beans              | <i>Phaseolus vulgaris</i>                    |
| A013M | Chickpea                  | <i>Cicer arietinum</i>                       |
| A013Q | Lentil                    | <i>Lens culinaris</i>                        |
| A013S | White lupine              | <i>Lupinus albus</i>                         |
| A013V | Chickling vetches         | <i>Lathyrus sativus</i>                      |
| A014D | Almond                    | <i>Amygdalus communis</i>                    |
| A014H | Cashew nut                | <i>Anacardium occidentale</i>                |
| A014J | Chestnuts                 | <i>Castanea</i> spp.                         |
| A014K | Coconut                   | <i>Cocos nucifera</i>                        |
| A014L | Hazelnut                  | <i>Corylus avellana</i>                      |
| A014N | Pecan                     | <i>Carya illinoensis</i>                     |
| A014Q | Pistachio                 | <i>Pistacia vera</i>                         |
| A014R | Walnut                    | <i>Juglans regia</i>                         |
| A015G | Linseed                   | <i>Linum usitatissimum</i>                   |
| A015H | Peanut                    | <i>Arachis hypogaea</i>                      |
| A015K | Sesame                    | <i>Sesamum indicum</i>                       |
| A015L | Sunflower                 | <i>Helianthus annuus</i>                     |
| A015S | Mustard seeds             | <i>Sinapis</i> spp.                          |
| A015Y | Safflower seeds           | <i>Carthamus tinctorius</i>                  |
| A016P | Oil palms                 | <i>Elaeis guineensis</i>                     |
| A017J | Rosemary                  | <i>Salvia rosmarinus</i>                     |
| A017Q | Thyme                     | <i>Thymus vulgare</i>                        |
| A017Y | Anise seed                | <i>Pimpinella anisum</i>                     |
| A018F | Dill                      | <i>Anethum graveolens</i>                    |
| A018G | Fennel                    | <i>Foeniculum vulgare</i>                    |
| A018Z | Peppercorn                | <i>Piper nigrum</i>                          |
| A019V | Cinnamon bark             | <i>Cinnamomum verum</i>                      |
| A01AM | Caper                     | <i>Capparis spinosa</i>                      |
| A01AR | Saffron                   | <i>Crocus sativus</i>                        |
| A01BP | Olive                     | <i>Olea europaea</i>                         |
| A01BV | Pine nuts                 | <i>Pinus</i> spp.                            |
| A01BY | Lemon                     | <i>Citrus limon</i>                          |
| A01CA | Lime                      | <i>Citrus aurantifolia</i>                   |
| A01CD | Mandarins, clementine     | <i>Citrus reticulata</i>                     |
| A01CY | Grapefruits               | <i>Citrus paradisi</i>                       |
| A01DJ | Apples                    | <i>Malus domestica</i>                       |
| A01DL | Loquats                   | <i>Eriobotrya japonica</i>                   |
| A01DP | Pear                      | <i>Pyrus communis</i>                        |
| A01DX | Grapes                    | <i>Vitis vinifera</i>                        |
| A01EA | Strawberry                | <i>Fragaria x ananassa</i> Duchene ex Rozier |
| A01EE | Blackberry                | <i>Rubus fruticosus</i>                      |
| A01EM | Cloudberry                | <i>Rubus chamaemorus</i>                     |
| A01EP | Raspberries               | <i>Rubus idaeus</i>                          |
| A01EY | Blueberries               | <i>Vaccinium corymbosum</i>                  |
| A01FH | Cranberries               | <i>Vaccinium macrocarpon</i>                 |
| A01FK | Cowberries, lingonberries | <i>Vaccinium vitis</i>                       |
| A01FM | Redcurrant                | <i>Ribes rubrum</i>                          |
| A01FN | Blackcurrant              | <i>Ribes nigrum</i>                          |
| A01GF | Apricots                  | <i>Armeniaca vulgaris</i>                    |
| A01GH | Sour cherry               | <i>Prunus cerasus</i>                        |
| A01GK | Sweet cherry              | <i>Prunus avium</i>                          |
| A01GM | Common peaches            | <i>Prunus persica</i>                        |
| A01GN | Nectarines                | <i>Persica vulgaris</i>                      |
| A01GQ | Plum                      | <i>Prunus domestica</i>                      |
| A01HF | Date                      | <i>Phoenix dactylifera</i>                   |
| A01HG | Fig                       | <i>Ficus carica</i>                          |
| A01HQ | Kaki                      | <i>Diospyros kaki</i>                        |
| A01JT | Kiwi                      | <i>Actinidia Lindl.</i> spp.                 |
| A01KC | Passionfruit              | <i>Passiflora edulis</i>                     |
| A01KD | Prickly pear              | <i>Opuntia ficus-indica</i>                  |

|       |                             |                                   |
|-------|-----------------------------|-----------------------------------|
| A01LB | Avocado                     | <i>Persea americana</i>           |
| A01LC | Common banana, plantain     | <i>Musa acuminata</i>             |
| A01LF | Mango                       | <i>Mangifera indica</i>           |
| A01LG | Papayas                     | <i>Carica papaya</i>              |
| A01LH | Pomegranate                 | <i>Punica granatum</i>            |
| A01LJ | Cherimoya                   | <i>Annona cherimola</i>           |
| A01LP | Pineapple                   | <i>Ananas comosus</i>             |
| A01QV | Cow                         | <i>Bos taurus</i>                 |
| A01QZ | Buffalo                     | <i>Bubalus</i> spp.               |
| A01RG | Pig, boar                   | <i>Sus scrofa</i>                 |
| A01RH | Sheep                       | <i>Ovis aries</i>                 |
| A01RL | Goat                        | <i>Capra aegagrus</i>             |
| A01RM | Horse                       | <i>Equus ferus</i>                |
| A01RQ | Rabbit                      | <i>Oryctolagus cuniculus</i>      |
| A01SA | Red deer                    | <i>Cervus elaphus</i>             |
| A01SE | European moose              | <i>Alces alces</i>                |
| A01SF | Reindeer                    | <i>Rangifer tarandus</i>          |
| A01SG | Roe deer                    | <i>Capreolus capreolus</i>        |
| A01SJ | Hare                        | <i>Lepus europaeus</i>            |
| A01SP | Chicken                     | <i>Gallus gallus</i>              |
| A01SQ | Turkey                      | <i>Meleagris gallopavo</i>        |
| A01SR | Duck                        | <i>Anas platyrhynchos</i>         |
| A01SS | Goose                       | <i>Anser anser</i>                |
| A01SZ | Pheasant                    | <i>Phasianus colchicus</i>        |
| A01TA | Pigeon                      | <i>Columba livia</i>              |
| A01TB | Quail                       | <i>Coturnix coturnix</i>          |
| A01TK | Ptarmigan                   | <i>Lagopus muta</i>               |
| A027B | European freshwater bream   | <i>Abramis brama</i>              |
| A027Q | European perch              | <i>Perca fluviatilis</i>          |
| A027X | Northern pike               | <i>Esox lucius</i>                |
| A027Y | Pike-perch                  | <i>Stizostedion lucioperca</i>    |
| A028K | European eel                | <i>Anguilla anguilla</i>          |
| A028P | Atlantic salmon             | <i>Salmo salar</i>                |
| A028X | Pink salmon                 | <i>Oncorhynchus gorbuscha</i>     |
| A029B | Smelt                       | <i>Osmerus eperlanus</i>          |
| A029E | Sturgeon                    | <i>Huso huso</i>                  |
| A029F | Trout                       | <i>Oncorhynchus clarkii</i>       |
| A029G | Arctic char                 | <i>Salvelinus alpinus</i>         |
| A029N | Rainbow trout               | <i>Salmo gairdneri</i>            |
| A029Q | Whitefish, <i>Coregonus</i> | <i>Coregonus</i> spp.             |
| A029T | Sea bass                    | <i>Morone labrax</i>              |
| A029V | Sea bream                   | <i>Pagellus centrodontus</i>      |
| A029Z | Wolffish                    | <i>Anarhichas lupus</i>           |
| A02AD | Mullets                     | <i>Mugil cephalus</i>             |
| A02AL | European conger             | <i>Conger conger</i>              |
| A02AN | Scorpion fish               | <i>Scorpaena dactyloptera</i>     |
| A02AP | Atlantic pomfret            | <i>Brama brama</i>                |
| A02AS | Common dab                  | <i>Limanda limanda</i>            |
| A02AT | Flounders                   | <i>Platichthys flesus</i>         |
| A02AZ | Atlantic halibut            | <i>Hippoglossus hippoglossus</i>  |
| A02BE | European plaice             | <i>Pleuronectes platessa</i>      |
| A02BF | Sole                        | <i>Solea solea</i>                |
| A02BG | Turbot                      | <i>Scophthalmus maximus</i>       |
| A02BJ | Monkfish, anglerfish        | <i>Lophius</i> spp.               |
| A02BS | Garfish                     | <i>Belone belone</i>              |
| A02BV | Cod                         | <i>Gadus callarias</i>            |
| A02CB | Hakes                       | <i>Merluccius</i> spp.            |
| A02CC | Ling                        | <i>Molva molva</i>                |
| A02CF | Coalfish                    | <i>Pollachius virens</i>          |
| A02CG | Whiting                     | <i>Gadus merlangus</i>            |
| A02CJ | Norway pout                 | <i>Trisopterus esmarkii</i>       |
| A02CN | Horse mackerel              | <i>Trachurus capensis</i>         |
| A02CV | Atlantic mackerel           | <i>Scomber scombrus</i>           |
| A02DB | European sardine            | <i>Sardina pilchardus</i> Walbaum |

|       |                              |                                   |
|-------|------------------------------|-----------------------------------|
| A02DD | Anchovies                    | <i>Engraulis encrasicolus</i>     |
| A02DF | Herrings                     | <i>Clupea harengus</i>            |
| A02DH | European sprat               | <i>Sprattus sprattus</i>          |
| A02DN | Smooth hounds                | <i>Mustelus</i> spp.              |
| A02DP | Spiny dogfish                | <i>Squalus acanthias</i>          |
| A02DQ | Common skate                 | <i>Dipturus batis</i>             |
| A02DS | Bonito                       | <i>Sarda chilensis</i>            |
| A02DX | Tuna                         | <i>Thunnus alalunga</i>           |
| A02EF | Skipjack tuna                | <i>Katsuwonus pelamis</i>         |
| A02FG | European freshwater crayfish | <i>Astacus astacus</i>            |
| A02FK | Barnacle                     | <i>Megabalanus tintinnabulum</i>  |
| A02FL | European spider crab         | <i>Maja squinado</i>              |
| A02FP | American lobster             | <i>Homarus americanus</i>         |
| A02FS | Norwegian lobster            | <i>Nephrops norvegicus</i>        |
| A02FV | Spiny lobster                | <i>Palinurus elephas</i>          |
| A02FY | Giant tiger prawn            | <i>Penaeus monodon</i>            |
| A02FZ | Northern prawn               | <i>Pandalus borealis</i>          |
| A02GB | Common shrimps               | <i>Crangon crangon</i>            |
| A02GQ | Purple urchin                | <i>Paracentrotus lividus</i>      |
| A02GS | Common periwinkle            | <i>Littorina littorea</i>         |
| A02HA | Smoot clam                   | <i>Callista chione</i>            |
| A02HB | Razor clam                   | <i>Solen marginatus</i>           |
| A02HE | Cockles                      | <i>Cardium edule</i>              |
| A02HF | Common mussel                | <i>Mytilus edulis</i>             |
| A02HJ | European oyster              | <i>Ostrea edulis</i>              |
| A02JB | Cuttlefishes                 | <i>Sepia officinalis</i>          |
| A02JE | Octopuses                    | <i>Octopus vulgaris</i>           |
| A02JJ | Squids                       | <i>Loligo forbesi</i>             |
| A02LL | Garden snail                 | <i>Helix aspersa</i>              |
| A02LN | Roman snail                  | <i>Helix pomatia</i>              |
| A03GK | Coffee bean                  | <i>Coffea liberica</i>            |
| A03HF | Cocoa bean                   | <i>Theobroma cacao</i>            |
| A048Z | Yeast cultures               | <i>Saccharomyces</i> spp.         |
| A04KK | Tea leaves                   | <i>Camellia sinensis</i>          |
| A07Y0 | Swordfish                    | <i>Xiphias gladius</i>            |
| A0CFN | Gooseberry                   | <i>Ribes uva-crispa</i>           |
| A0CFR | Rose hips                    | <i>Rosa</i> spp.                  |
| A0CGX | Ginger                       | <i>Zingiber officinale</i>        |
| A0DER | Borage                       | <i>Borago officinalis</i>         |
| A0DLT | Butternut squashes           | <i>Cucurbita moschata</i>         |
| A0DMX | Tomatoes                     | <i>Solanum lycopersicum</i>       |
| A0DZB | Oranges                      | <i>Citrus sinensis</i>            |
| A0F7F | Lumpfish                     | <i>Cyclopterus lumpus</i>         |
| A0F9K | Marble goby                  | <i>Oxyeleotris marmorata</i>      |
| A0FAL | Megrims                      | <i>Lepidorhombus whiffiagonis</i> |
| A0FAM | Pollock                      | <i>Pollachius pollachius</i>      |
| A0FAN | Blue whiting                 | <i>Micromesistius poutassou</i>   |
| A0FAP | Alaska pollock               | <i>Theragra chalcogramma</i>      |
| A0FAR | Gilthead seabream            | <i>Sparus aurata</i>              |
| A0FAS | Groupers                     | <i>Epinephelus</i> spp.           |
| A0FBD | Sea catfish                  | <i>Bagre marinus</i>              |
| A0FBH | Alfonsino                    | <i>Beryx</i> spp.                 |
| A0FBN | Amberjack                    | <i>Seriola</i> spp.               |
| A0FBQ | Blue shark                   | <i>Prionace glauca</i>            |
| A0FCP | Edible crab                  | <i>Cancer pagurus</i>             |
| A170Z | Rockweed                     | <i>Ascophyllum nodosum</i>        |
