# Supplementary material for: Food biodiversity and total and cause-specific mortality in 9 European countries: An analysis of a prospective cohort study
Source: PubMed Central journal article supplement (PMC8559947; doi:10.1371/journal.pmed.1003834), 2021-10-18
Supplement: pmed.1003834.s005.pdf [file pmed.1003834.s005.pdf]

**S2 Table. Associations between food biodiversity and total mortality rates from multivariable Cox proportional hazards regression models, EPIC cohort, 1992-2014.** EPIC, European Prospective Investigation into Cancer and Nutrition.

|                                                 | Per 10-species increment | P-value | Quintiles (Qs) of dietary species richness (DSR) |                  |                  |                  |                  | P-trend |
|-------------------------------------------------|--------------------------|---------|--------------------------------------------------|------------------|------------------|------------------|------------------|---------|
|                                                 |                          |         | Q <sub>1</sub>                                   | Q <sub>2</sub>   | Q <sub>3</sub>   | Q <sub>4</sub>   | Q <sub>5</sub>   |         |
| <b>DSR, species per year</b>                    |                          |         | <48                                              | [48 – 64]        | [64 – 72]        | [72 – 81]        | ≥81              |         |
| <b>Total mortality</b>                          |                          |         |                                                  |                  |                  |                  |                  |         |
| All (cases/person-years)                        | 46,627/7,506,482         |         | 10,313/1,577,991                                 | 10,712/1,662,237 | 8,068/1,532,349  | 8,842/1,479,202  | 8,692/1,254,703  |         |
| Sex-adjusted model - HR (95% CI) <sup>a</sup>   | 0.84 (0.83-0.85)         | <0.001  | 1.00 (ref)                                       | 0.83 (0.80-0.86) | 0.67 (0.64-0.70) | 0.56 (0.54-0.58) | 0.50 (0.47-0.52) | <0.001  |
| Multi-adjusted model - HR (95% CI) <sup>b</sup> | 0.90 (0.89-0.90)         | <0.001  | 1.00 (ref)                                       | 0.91 (0.88-0.94) | 0.80 (0.76-0.83) | 0.69 (0.66-0.72) | 0.63 (0.59-0.66) | <0.001  |

<sup>a</sup>Sex-adjusted models were stratified for centre, age at recruitment (1-y intervals, time-scale), and sex.

<sup>b</sup>Multi-adjusted models were stratified for centre, age at recruitment (1-y intervals, time-scale), and sex and adjusted for baseline alcohol intake (g/day), physical activity (Cambridge index: active; moderately active; moderately inactive; inactive; missing), marital status (single, divorced, separated, or widowed; married or living together; unknown), smoking status and intensity of smoking (current, 1-15 cigarettes/day; current, 16-25 cigarettes/day; current, 26+ cigarettes/day; current, pipe/cigar/occasional; current/former, missing; former, quit 11-20y; former, quit 20+y; former, quit ≤ 10y; never; unknown), educational level [longer education (incl. university degree, technical or professional school); secondary school; primary school completed; not specified], baseline energy intake (kcal/day), baseline fibre intake (g/day), baseline red and processed meat consumption (g/day), and an 18-point Mediterranean diet score [49].

**Abbreviations:** CI, confidence interval; HR, hazard ratio.
