# Supplementary material for: Food biodiversity and total and cause-specific mortality in 9 European countries: An analysis of a prospective cohort study
Source: PubMed Central journal article supplement (PMC8559947; doi:10.1371/journal.pmed.1003834), 2021-10-18
Supplement: pmed.1003834.s006.pdf [file pmed.1003834.s006.pdf]

**S3 Table. Associations between food biodiversity and total mortality rates from multivariable Cox proportional hazards regression models by sex, EPIC cohort, 1992-2014.** EPIC, European Prospective Investigation into Cancer and Nutrition.

|                                                 | N       | Per 10-species increment | P-value | Quintiles (Qs) of dietary species richness (DSR) |                  |                  |                  |                  | P-trend |
|-------------------------------------------------|---------|--------------------------|---------|--------------------------------------------------|------------------|------------------|------------------|------------------|---------|
|                                                 |         |                          |         | Q <sub>1</sub>                                   | Q <sub>2</sub>   | Q <sub>3</sub>   | Q <sub>4</sub>   | Q <sub>5</sub>   |         |
| <b>Female</b>                                   | 319,608 |                          |         |                                                  |                  |                  |                  |                  |         |
| DSR, species per year                           |         |                          |         | <47                                              | [47 – 62]        | [62 – 71]        | [71 – 80]        | ≥80              |         |
| All (cases/person-years)                        |         | 25,211/5,374,647         |         | 5,233/1,145,668                                  | 5,366/1,040,700  | 4,978/1,132,122  | 4,618/1,114,676  | 5,016/941,482    |         |
| Multi-adjusted model - HR (95% CI) <sup>a</sup> |         | 0.93 (0.92-0.94)         | <0.001  | 1.00 (ref)                                       | 0.94 (0.90-0.98) | 0.87 (0.82-0.91) | 0.77 (0.73-0.82) | 0.73 (0.68-0.78) | <0.001  |
| <b>Male</b>                                     | 131,782 |                          |         |                                                  |                  |                  |                  |                  |         |
| DSR, species per year                           |         |                          |         | <56                                              | [56 – 67]        | [67 – 74]        | [74 – 82]        | ≥82              |         |
| All (cases/person-years)                        |         | 21,416/2,131,834         |         | 6,650/515,076                                    | 3,883/440,477    | 2,979/383,975    | 5,969/523,579    | 1,935/268,728    |         |
| Multi-adjusted model - HR (95% CI) <sup>a</sup> |         | 0.84 (0.83-0.86)         | <0.001  | 1.00 (ref)                                       | 0.78 (0.74-0.83) | 0.63 (0.59-0.67) | 0.58 (0.54-0.62) | 0.50 (0.46-0.54) | <0.001  |

<sup>a</sup>Multi-adjusted models were stratified for centre and age at recruitment (1-y intervals, time-scale) and adjusted for baseline alcohol intake (g/day), physical activity (Cambridge index: active; moderately active; moderately inactive; inactive; missing), marital status (single, divorced, separated, or widowed; married or living together; unknown), smoking status and intensity of smoking (current, 1-15 cigarettes/day; current, 16-25 cigarettes/day; current, 26+ cigarettes/day; current, pipe/cigar/occasional; current/former, missing; former, quit 11-20y; former, quit 20+y; former, quit ≤ 10y; never; unknown), educational level [longer education (incl. university degree, technical or professional school); secondary school; primary school completed; not specified], baseline energy intake (kcal/day), baseline fibre intake (g/day), baseline red and processed meat consumption (g/day), and an 18-point Mediterranean diet score [49].

**Abbreviations:** CI, confidence interval; HR, hazard ratio.
