# Supplementary material for: Food biodiversity and total and cause-specific mortality in 9 European countries: An analysis of a prospective cohort study
Source: PubMed Central journal article supplement (PMC8559947; doi:10.1371/journal.pmed.1003834), 2021-10-18
Supplement: pmed.1003834.s007.pdf [file pmed.1003834.s007.pdf]

**S4 Table. Associations between food biodiversity and total mortality rates from multivariable Cox proportional hazards regression models by country, EPIC cohort, 1992-2014.** EPIC, European Prospective Investigation into Cancer and Nutrition.

|                                                 | Per 10-species increment | P-value | Quintiles (Qs) of dietary species richness (DSR) |                  |                  |                  |                  | P-trend |
|-------------------------------------------------|--------------------------|---------|--------------------------------------------------|------------------|------------------|------------------|------------------|---------|
|                                                 |                          |         | Q <sub>1</sub>                                   | Q <sub>2</sub>   | Q <sub>3</sub>   | Q <sub>4</sub>   | Q <sub>5</sub>   |         |
| <b>Denmark</b>                                  |                          |         |                                                  |                  |                  |                  |                  |         |
| DSR, species per year                           |                          |         | <67                                              | [67 – 72]        | [72 – 75]        | [75 – 78]        | ≥78              |         |
| All (cases/person-years)                        | 9,418/888,078            |         | 3,494/216,480                                    | 2,010/194,836    | 1,395/158,601    | 1,447/172,529    | 1,072/145,631    |         |
| Multi-adjusted model - HR (95% CI) <sup>a</sup> | 0.82 (0.80-0.84)         | <0.001  | 1.00 (ref)                                       | 0.76 (0.72-0.81) | 0.70 (0.65-0.74) | 0.69 (0.65-0.74) | 0.65 (0.61-0.70) | <0.001  |
| <b>France</b>                                   |                          |         |                                                  |                  |                  |                  |                  |         |
| DSR, species per year                           |                          |         | <42                                              | [42 – 62]        | [62 – 70]        | [70 – 76]        | ≥76              |         |
| All (cases/person-years)                        | 4,455/1,303,948          |         | 1,049/265,399                                    | 1,107/270,743    | 867/284,128      | 728/244,715      | 704/238,963      |         |
| Multi-adjusted model - HR (95% CI) <sup>a</sup> | 0.98 (0.96-1.00)         | 0.03    | 1.00 (ref)                                       | 1.01 (0.93-1.11) | 0.86 (0.78-0.94) | 0.92 (0.83-1.01) | 0.96 (0.86-1.06) | 0.03    |
| <b>Germany</b>                                  |                          |         |                                                  |                  |                  |                  |                  |         |
| DSR, species per year                           |                          |         | <76                                              | [76 – 81]        | [81 – 84]        | [84 – 88]        | ≥88              |         |
| All (cases/person-years)                        | 3,430/674,650            |         | 1,263/149,179                                    | 818/145,049      | 535/121,233      | 530/158,866      | 264/100,323      |         |
| Multi-adjusted model - HR (95% CI) <sup>a</sup> | 0.85 (0.82-0.89)         | <0.001  | 1.00 (ref)                                       | 0.88 (0.80-0.96) | 0.81 (0.73-0.90) | 0.73 (0.66-0.82) | 0.64 (0.56-0.74) | <0.001  |
| <b>Italy</b>                                    |                          |         |                                                  |                  |                  |                  |                  |         |
| DSR, species per year                           |                          |         | <61                                              | [61 – 67]        | [67 – 71]        | [71 – 76]        | ≥76              |         |
| All (cases/person-years)                        | 2,423/689,933            |         | 663/142,376                                      | 585/151,359      | 389/126,995      | 451/146,004      | 335/123,199      |         |
| Multi-adjusted model - HR (95% CI) <sup>a</sup> | 0.89 (0.85-0.94)         | <0.001  | 1.00 (ref)                                       | 0.95 (0.85-1.07) | 0.78 (0.68-0.89) | 0.86 (0.75-0.98) | 0.78 (0.66-0.92) | <0.001  |
| <b>the Netherlands</b>                          |                          |         |                                                  |                  |                  |                  |                  |         |
| DSR, species per year                           |                          |         | <60                                              | [60 – 65]        | [65 – 68]        | [68 – 71]        | ≥71              |         |
| All (cases/person-years)                        | 3,471/610,475            |         | 1,343/140,988                                    | 918/144,492      | 525/113,244      | 432/114,368      | 253/97,383       |         |
| Multi-adjusted model - HR (95% CI) <sup>a</sup> | 0.86 (0.82-0.91)         | <0.001  | 1.00 (ref)                                       | 0.93 (0.86-1.02) | 0.87 (0.78-0.96) | 0.82 (0.73-0.92) | 0.69 (0.59-0.79) | <0.001  |
| <b>Norway</b>                                   |                          |         |                                                  |                  |                  |                  |                  |         |
| DSR, species per year                           |                          |         | <35                                              | [35 – 40]        | [40 – 44]        | [44 – 49]        | ≥49              |         |
| All (cases/person-years)                        | 1,138/471,145            |         | 349/112,099                                      | 209/80,461       | 230/97,296       | 203/91,479       | 147/89,810       |         |
| Multi-adjusted model - HR (95% CI) <sup>a</sup> | 0.77 (0.69-0.86)         | <0.001  | 1.00 (ref)                                       | 0.92 (0.77-1.10) | 0.89 (0.75-1.07) | 0.88 (0.73-1.07) | 0.66 (0.53-0.82) | <0.001  |
| <b>Spain</b>                                    |                          |         |                                                  |                  |                  |                  |                  |         |

|                                                 |                  |        |               |                  |                  |                  |                  |        |
|-------------------------------------------------|------------------|--------|---------------|------------------|------------------|------------------|------------------|--------|
| DSR, species per year                           |                  |        | <35           | [35 – 40]        | [40 – 44]        | [44 – 49]        | ≥49              |        |
| All (cases/person-years)                        | 3,429/737,975    |        | 1,006/163,920 | 780/158,648      | 609/140,311      | 556/139,988      | 478/135,107      |        |
| Multi-adjusted model - HR (95% CI) <sup>a</sup> | 0.88 (0.83-0.92) | <0.001 | 1.00 (ref)    | 0.88 (0.80-0.97) | 0.82 (0.73-0.91) | 0.78 (0.70-0.88) | 0.75 (0.66-0.85) | <0.001 |
| <b>Sweden</b>                                   |                  |        |               |                  |                  |                  |                  |        |
| DSR, species per year                           |                  |        | <45           | [45 – 54]        | [54 – 60]        | [60 – 63]        | ≥63              |        |
| All (cases/person-years)                        | 8,633/878,162    |        | 3,693/212,320 | 2,226/192,489    | 1,170/169,380    | 844/162,753      | 700/141,220      |        |
| Multi-adjusted model - HR (95% CI) <sup>a</sup> | 0.89 (0.87-0.92) | <0.001 | 1.00 (ref)    | 0.91 (0.86-0.96) | 0.83 (0.76-0.90) | 0.80 (0.72-0.89) | 0.75 (0.67-0.84) | <0.001 |
| <b>the United Kingdom</b>                       |                  |        |               |                  |                  |                  |                  |        |
| DSR, species per year                           |                  |        | <71           | [71 – 76]        | [76 – 81]        | [81 – 82]        | ≥82              |        |
| All (cases/person-years)                        | 3,904/760,356    |        | 714/160,357   | 613/152,542      | 910/152,991      | 859/151,662      | 808/142,804      |        |
| Multi-adjusted model - HR (95% CI) <sup>a</sup> | 0.96 (0.90-1.02) | 0.20   | 1.00 (ref)    | 1.03 (0.92-1.15) | 0.97 (0.87-1.09) | 0.91 (0.81-1.03) | 0.92 (0.82-1.04) | 0.03   |

<sup>a</sup>Multi-adjusted models were stratified for centre, age at recruitment (1-y intervals, time-scale), and sex and adjusted for baseline alcohol intake (g/day), physical activity (Cambridge index: active; moderately active; moderately inactive; inactive; missing), marital status (single, divorced, separated, or widowed; married or living together; unknown), smoking status and intensity of smoking (current, 1-15 cigarettes/day; current, 16-25 cigarettes/day; current, 26+ cigarettes/day; current, pipe/cigar/occasional; current/former, missing; former, quit 11-20y; former, quit 20+y; former, quit ≤ 10y; never; unknown), educational level [longer education (incl. university degree, technical or professional school); secondary school; primary school completed; not specified], baseline energy intake (kcal/day), baseline fibre intake (g/day), baseline red and processed meat consumption (g/day), and an 18-point Mediterranean diet score [49].

**Abbreviations:** CI, confidence interval; HR, hazard ratio.
