# Supplementary material for: Food biodiversity and total and cause-specific mortality in 9 European countries: An analysis of a prospective cohort study
Source: PubMed Central journal article supplement (PMC8559947; doi:10.1371/journal.pmed.1003834), 2021-10-18
Supplement: pmed.1003834.s009.pdf [file pmed.1003834.s009.pdf]

**S6 Table. E-values for HR and 95% CI, associations between dietary species richness and total and cause-specific mortality rates from multivariable Cox proportional hazards regression models, EPIC cohort, 1992-2014.** EPIC, European Prospective Investigation into Cancer and Nutrition.

|                            | Per 10-species increment |             | Q <sub>1</sub> | Q <sub>2</sub>   |             | Q <sub>3</sub>   |             | Q <sub>4</sub>   |             | Q <sub>5</sub>   |             |
|----------------------------|--------------------------|-------------|----------------|------------------|-------------|------------------|-------------|------------------|-------------|------------------|-------------|
|                            | HR (95% CI)              | E-value     | HR (95% CI)    | HR (95% CI)      | E-value     | HR (95% CI)      | E-value     | HR (95% CI)      | E-value     | HR (95% CI)      | E-value     |
| <b>Total mortality</b>     | 0.90 (0.89-0.90)         | 1.46 (1.46) | 1.00 (ref)     | 0.91 (0.88-0.94) | 1.43 (1.32) | 0.80 (0.76-0.83) | 1.81 (1.70) | 0.69 (0.66-0.72) | 2.26 (2.12) | 0.63 (0.59-0.66) | 2.55 (2.40) |
| <b>Cancer</b>              | 0.93 (0.92-0.95)         | 1.36 (1.29) | 1.00 (ref)     | 0.92 (0.87-0.97) | 1.39 (1.21) | 0.87 (0.82-0.93) | 1.56 (1.36) | 0.78 (0.73-0.83) | 1.88 (1.70) | 0.75 (0.69-0.82) | 2.00 (1.74) |
| <b>CVD</b>                 | 0.88 (0.85-0.91)         | 1.53 (1.43) | 1.00 (ref)     | 0.94 (0.86-1.03) | 1.32 (1.00) | 0.78 (0.69-0.87) | 1.88 (1.56) | 0.65 (0.57-0.74) | 2.45 (2.04) | 0.56 (0.49-0.65) | 2.97 (2.45) |
| <b>CHD</b>                 | 0.87 (0.84-0.90)         | 1.56 (1.46) | 1.00 (ref)     | 0.89 (0.80-0.99) | 1.50 (1.11) | 0.75 (0.64-0.86) | 2.00 (1.60) | 0.67 (0.58-0.78) | 2.35 (1.88) | 0.55 (0.46-0.65) | 3.04 (2.45) |
| <b>Respiratory disease</b> | 0.84 (0.80-0.88)         | 1.67 (1.53) | 1.00 (ref)     | 0.93 (0.80-1.09) | 1.36 (1.00) | 0.75 (0.62-0.91) | 2.00 (1.43) | 0.56 (0.46-0.69) | 2.97 (2.26) | 0.44 (0.34-0.55) | 3.97 (3.04) |
| <b>Digestive disease</b>   | 0.80 (0.76-0.86)         | 1.81 (1.60) | 1.00 (ref)     | 0.98 (0.80-1.21) | 1.16 (1.00) | 0.64 (0.49-0.83) | 2.50 (1.70) | 0.53 (0.41-0.69) | 3.18 (2.26) | 0.46 (0.34-0.63) | 3.77 (2.55) |

Multi-adjusted models were stratified for centre, age at recruitment (1-y intervals, time-scale), and sex and adjusted for baseline alcohol intake (g/day), physical activity (Cambridge index: active; moderately active; moderately inactive; inactive; missing), marital status (single, divorced, separated, or widowed; married or living together; unknown), smoking status and intensity of smoking (current, 1-15 cigarettes/day; current, 16-25 cigarettes/day; current, 26+ cigarettes/day; current, pipe/cigar/occasional; current/former, missing; former, quit 11-20y; former, quit 20+y; former, quit ≤ 10y; never; unknown), educational level [longer education (incl. university degree, technical or professional school); secondary school; primary school completed; not specified], baseline energy intake (kcal/day), baseline fibre intake (g/day), baseline red and processed meat consumption (g/day), and an 18-point Mediterranean diet score [1]. E-values were calculated from VanderWeele *et al.* [53] and Mathur *et al.* [54].

**Abbreviations:** CHD, coronary heart disease; CI, confidence interval; CVD, cardiovascular disease; HR, hazard ratio.
