# Supplementary material for: Food biodiversity and total and cause-specific mortality in 9 European countries: An analysis of a prospective cohort study
Source: PLoS Med. 2021 Oct 18;18(10):e1003834. doi: 10.1371/journal.pmed.1003834 (PMC8559947; doi:10.1371/journal.pmed.1003834)
Supplement: S5 Table — EPIC, European Prospective Investigation into Cancer and Nutrition. (PDF) [file pmed.1003834.s008.pdf]

**S5 Table. Associations between food biodiversity, adjusted for species richness per food group, and total mortality rates from multivariable Cox proportional hazards regression models, EPIC cohort, 1992-2014.** EPIC, European Prospective Investigation into Cancer and Nutrition.

|                                                 | Per 10-species increment | <i>P</i> -value | Δ HR |
|-------------------------------------------------|--------------------------|-----------------|------|
| <b>DSR, minus tuber species</b>                 |                          |                 |      |
| Multi-adjusted model - HR (95% CI) <sup>a</sup> | 0.91 (0.90-0.92)         | <0.001          | 1%   |
| <b>DSR, minus vegetable species</b>             |                          |                 |      |
| Multi-adjusted model - HR (95% CI) <sup>a</sup> | 0.88 (0.87-0.89)         | <0.001          | -2%  |
| <b>DSR, minus legume species</b>                |                          |                 |      |
| Multi-adjusted model - HR (95% CI) <sup>a</sup> | 0.91 (0.90-0.92)         | <0.001          | 1%   |
| <b>DSR, minus fruit, nut and seed species</b>   |                          |                 |      |
| Multi-adjusted model - HR (95% CI) <sup>a</sup> | 0.89 (0.88-0.90)         | <0.001          | -1%  |
| <b>DSR, minus dairy species</b>                 |                          |                 |      |
| Multi-adjusted model - HR (95% CI) <sup>a</sup> | 0.91 (0.90-0.91)         | <0.001          | 1%   |
| <b>DSR, minus cereal species</b>                |                          |                 |      |
| Multi-adjusted model - HR (95% CI) <sup>a</sup> | 0.91 (0.90-0.92)         | <0.001          | 1%   |
| <b>DSR, minus meat species</b>                  |                          |                 |      |
| Multi-adjusted model - HR (95% CI) <sup>a</sup> | 0.90 (0.89-0.91)         | <0.001          | 0%   |
| <b>DSR, minus fish and shellfish species</b>    |                          |                 |      |
| Multi-adjusted model - HR (95% CI) <sup>a</sup> | 0.89 (0.88-0.90)         | <0.001          | -1%  |
| <b>DSR, minus egg species</b>                   |                          |                 |      |
| Multi-adjusted model - HR (95% CI) <sup>a</sup> | 0.91 (0.90-0.92)         | <0.001          | 1%   |
| <b>DSR, minus condiment species</b>             |                          |                 |      |
| Multi-adjusted model - HR (95% CI) <sup>a</sup> | 0.90 (0.90-0.91)         | <0.001          | 0%   |

<sup>a</sup>Multi-adjusted models were stratified for centre, age at recruitment (1-y intervals, time-scale), and sex and adjusted for baseline alcohol intake (g/day), physical activity (Cambridge index: active; moderately active; moderately inactive; inactive; missing), marital status (single, divorced, separated, or widowed; married or living together; unknown), smoking status and intensity of smoking (current, 1-15 cigarettes/day; current, 16-25 cigarettes/day; current, 26+ cigarettes/day; current, pipe/cigar/occasional; current/former, missing; former, quit 11-20y; former, quit 20+y; former, quit ≤ 10y; never; unknown), educational level [longer education (incl. university degree, technical or professional school); secondary school; primary school completed; not specified], baseline energy intake (kcal/day), baseline fibre intake (g/day), baseline red and processed meat consumption (g/day), and an 18-point Mediterranean diet score [49].

**Abbreviations:** CI, confidence interval; DSR, dietary species richness; HR, hazard ratio.
